# Supplementary material
Source: PubMed Central journal article supplement (PMC1783987)
Supplement: bj4020163add.pdf [file bj4020163add.pdf]

**Supplemental Table:****Primers and Amplification Parameters for PCR Analysis of Chromatin Immunoprecipitation**

| Primer Pair    | Region Amplified | Primers                                                                                | PCR Parameters                                                                          |
|----------------|------------------|----------------------------------------------------------------------------------------|-----------------------------------------------------------------------------------------|
| Cat-1 Promoter | -37 to +156      | Forward<br>5'-CGCCGCGCTGTCATTGGTGC-3'<br>Reverse<br>5'-GGGGAGGAGGCGTCAGGATGC-3'        | 95°C 30 s<br>49°C 30 s<br>72°C Cycles 1-14: 45 s<br>Cycles 15-33: increase by 5 s/cycle |
| Cat-1 3'-UTR   | +78553 to +78719 | Forward<br>5'-AGCAAACCTGAGCAGTAAAGTGCT-3'<br>Reverse<br>5'-CGGACTTAATCTAATGTCATTGTA-3' | 95°C 30 s<br>49°C 30 s<br>72°C Cycles 1-11: 45 s<br>Cycles 12-30: increase by 5 s/cycle |
| $\beta$ -actin | -105 to +71      | Forward<br>5'-GAGTGAGCGAGCGGAGCCAAT-3'<br>Reverse<br>5'-CGACGTCCCTGCTTACCTGGT-3'       | 95°C 30 s<br>54°C 30 s<br>72°C Cycles 1-13: 45 s<br>Cycles 14-32: increase by 5 s/cycle |
| myogenin       | -280 to -1       | Forward<br>5'-GCCTCCCGACCCGTGCACAGG-3'<br>Reverse<br>5'-GGCTCGAAGCCCTGAAGGTGG-3'       | 95°C 30 s<br>52°C 30 s<br>72°C Cycles 1-33: 45 s                                        |

The Table shows the primers and amplification parameters for the ChIP experiment in Fig. 3A.
